# Supplementary material for: Performance of tree-building methods using a morphological dataset and a well-supported Hexapoda phylogeny
Source: PeerJ journal article supplement (doi:10.7717/peerj.16706), 2024-01-08
Supplement: FileS1.pdf [file FileS1.pdf]

### **Operational adaptations in Beutel & Gorb (2001) matrix:**

Operational adaptations were made in the terminal groups, the group-names were updated and edited according to the most recent information and the two matrices were standardized for comparison.

- 1) “Chilopoda” and “Symphyla” were removed,
- 2) “Lepism.-Nicolet.” instead of “Tricholepidion” was chosen as the standard for Zygentoma because it contains less missing data, the monophyly of Zygentoma is strongly supported in most recent studies (Blanke et al., 2014; Song et al., 2016),
- 3) “Grylloblatodea” was treated as “Xenonomia”, the monophyly of Xenonomia is strongly supported in several studies (Beutel & Gorb, 2006; Terry & Whiting, 2005; Wipfler et al., 2011) and Mantophasmatodea was not known until Klass et al. (2002),
- 4) “Ensifera”, instead of “Caelifera” was chosen as a standard for Orthoptera because it contains less missing data, the monophyly of Orthoptera is strongly supported in several studies (Beutel & Gorb, 2001; Flook & Rowell, 1997, 1999; Song, 2010, 2015; Zhang et al., 2013),
- 5) “Heteroptera” was chosen as the standard for Hemiptera, considering that the monophyly of this suborder is less contested than the monophyly of the others suborders, besides that the monophyly of Hemiptera is strongly supported in several studies (Beutel & Gorb, 2001; Cryan & Urban, 2012; Song et al., 2012, 2019). The main reason Orthoptera and Hemiptera are treated as sub-orders in the work Beutel & Gorb (2001) was for the study of the evolution of adhesive pad character within these orders and Hexapoda in general.

### **Beutel & Gorb (2001) adapted matrix (Nexus format):**

*#NEXUS*

*BEGIN DATA;*

*DIMENSIONS NTAX=32 NCHAR=115;*

*FORMAT DATATYPE = STANDARD GAP = - MISSING = ? SYMBOLS = "0 1 2 3 4 5 6 7";*

*MATRIX*

*Diplura 111000000-00100010000001000000000000100100-----0??0?00000000(12)*  
*(01)0---00000(01)(02)-01000-01000000010100000000000000*  
*Protura 110001000-0012--20100001000000000000100000-----0??0?0?000001210---*  
*0000301-0?000-110?00000?000000000000000000*

*Collembola* 110001000-00100020000001000001000000100000-----0??0?  
00000111210---0000202000000-11000000000100000000000000

*Archaeognatha* 101000001000010100000000000000000000121100-----0?  
000000000000010001000010000000-00010000010100000000000000

*Zygentoma* 101110111010010101010001010010000000121100-----0100000000(02)  
(01)01011001000010000000-00020100020100000000000000

*Ephemeroptera*  
1011101010100101010100010000100000011411010000000000000011000000021000210010000  
14000000000022000020100100000001000

*Odonata*  
10111011101001010201000100001100000112110100000000000001011000000(01)210001000000  
00100000000010210000201011000000000000

*Plecoptera*  
101110111010010102010001000011000001121101101(01)100(01)0000010000100001210002-  
00000001000000000(01)022000020101101010000000

*Dermoptera* 111110111010010102010001000001100001121101101111020000010(01)  
(01)0000001210001100000001200000000102201102010101(01)001000000

*Blattodea*  
1011101111100101020100010000111001011411011011110100000100000000012100011000110010  
000000001022000021101001010000000

*Isoptera*  
101110111110010102010001000011100101141101101100000000010000000001210(01)011000110  
010000000001022000021101011000000000

*Mantodea*  
1011101111100101020100010000111001011411011010110100000100000000012100011000110010  
000000001022000021101000010000000

*Embioptera*  
111110111011010102010001000011110001121101101100000000010000100001210002-  
000000010000000001022010020101010001000000

*Orthoptera*  
1011101110100101020100010000011000111311111010110101000100000000012100011000000010  
000000001022000020101000010000000

*Phasmatodea*  
101110111010010102010001000011110101141101101011010100010000000001210001100000001  
0000000001022001020101001010000000

*Xenonomia* 11111011101001010201000100001110000-14110-----?  
0000000012100011000000010000000-010?2000020101000010000000  
*Zoraptera* 10111011101001010201000100?001100?01111011?1100?0000??????0???00?  
210102-00000011000???00010?2?00020101010000000000  
*Thysanoptera* 10111011101001013-2101110(01)0001101?01111011011001000?  
001001000000121110(12)1000000211000000001022000020111002000000000  
*Psocoptera* 101110111010011102010111000111101?  
011211011011001000000101100000012111011000000213000010001022000020101000100000001  
*Phthiraptera* 111110111010011102010111000111101?0-11110-----00-0000000001211102-  
000000213000000-010220000201010000(01)0002000  
*Hemiptera* 10111011101001014-  
1111110000110100112110110110010000001000000200121110(12)1000000215000000001022000  
020101(01)0(01)(01)(01)0(01)00000  
*Neuroptera*  
10111011101001010201000100000110000114110110100010000211000000(23)111211102-  
110000013100000001022000020111(01)0(01)000000000  
*Megaloptera*  
101110111010101020100010(01)000110000114110110100010000(01)111000002111211102-  
11000001(16)1(01)0000101022000020111100001000000  
*Raphidioptera* 10111011101010102010001000001100?  
0114110110100010000111100000(23)111211102-  
1100000161(01)0000101022000020111000001000000  
*Coleoptera*  
10111011101010102010001000001100001141101101100130001110110000001211102-  
01000001(37)1(01)0000101022000020111(01)00001000000  
*Strepsiptera* 1(01)111011--1001010-  
010001000001100001141101101100101001110110000001211302---000000-1-??00(01)010?2?  
00020111000001000000  
*Hymenoptera*  
1011101110100101020100010(01)1001100001141101101100100000010(01)10002001211(01)0110  
00000013100010111022000020111001000000(01)00  
*Trichoptera* 10111011101001010-01----  
0010011000011411011110010000001010000(23)001211102-  
0000000131111011112200002011110(01)(01)00000000

*Lepidoptera*

1011101110100101020100010010011000011411011111001000000100(01)000(123)001211102-  
00000001311110111122000020111001200000000

*Mecoptera*

1011101110100101020100010010011000011411011111001000100100(01)1012001210102-  
00000101(13)1111011102200012011100(01)000000000

*Diptera*

11001100100110000114110111110010201001001000(12)001211102-  
0000010131111111102200002011(01)0(01)(02)000000(01)0

10111011101001010-

*Siphonaptera*

1111011101001010-11101100100110000-14112-----0111010001211102-  
00000101(13)100111-11022000120111000100000000

;

END;

**References**

- Beutel, R. G., & Gorb, S. N. (2001). Ultrastructure of attachment specializations of hexapods (Arthropoda): evolutionary patterns inferred from a revised ordinal phylogeny. *Journal of Zoological Systematics and Evolutionary Research*, 39, 177–207. <https://doi.org/10.1046/j.1439-0469.2001.00155.x>
- Beutel, R. G., & Gorb, S. N. (2006). A revised interpretation of the evolution of attachment structures in Hexapoda with special emphasis on Mantophasmatodea. *Arthropod Systematics & Phylogeny*, 64, 3–25.
- Blanke, A., Koch, M., Wipfler, B., Wilde, F., & Misof, B. (2014). Head morphology of *Tricholepidion gertschi* indicates monophyletic Zygentoma. *Frontiers in Zoology*, 11, 1–19. <https://doi.org/10.1186/1742-9994-11-16>
- Cryan, J. R., & Urban, J. M. (2012). Higher-level phylogeny of the insect order Hemiptera: is Auchenorrhyncha really paraphyletic? *Systematic Entomology*, 37, 7–21. <https://doi.org/10.1111/j.1365-3113.2011.00611.x>
- Flook, P. K., & Rowell, C. H. F. (1997). The effectiveness of mitochondrial rRNA sequences for the reconstruction of the phylogeny of an insect order (Orthoptera). *Molecular Phylogenetics and Evolution*, 8, 177–192. <https://doi.org/10.1006/mpev.1997.0425>
- Flook, P. K., & Rowell, C. H. F. (1999). Combined molecular phylogenetic analysis of the Orthoptera (Arthropoda, Insecta) and implications for their higher systematics. *Systematic Biology*, 48, 233–253. <https://doi.org/10.1080/106351599260274>

- Klass, K. D., Zompro, O., Kristensen, N. P., & Adis, J. (2002). Mantophasmatodea: a new insect order with extant members in the Afrotropics. *Science*, 296, 1456–1459. <https://doi.org/10.1126/science.1069397>
- Song, H. (2010). Grasshopper systematics: past, present and future. *Journal of Orthoptera Research*, 19, 57–68. <https://doi.org/10.1665/034.019.0112>
- Song, H. (2015). 300 million years of diversification: elucidating the patterns of orthopteran evolution based on comprehensive taxon and gene sampling. *Cladistics*, 31, 621–651. <https://doi.org/10.1111/cla.12116>
- Song, F., Li, H., Jiang, P., Zhou, X., Liu, J., Sun, C., Vogler, A. P., & Cai, W. (2016). Capturing the phylogeny of Holometabola with mitochondrial genome data and Bayesian site-heterogeneous mixture model. *Genome Biology and Evolution*, 8, 1411–1426. <https://doi.org/10.1093/gbe/evw086>
- Song, N., Liang, A.-P., & Bu, C.-P. (2012). A molecular phylogeny of Hemiptera inferred from mitochondrial genome sequences. *PLoS ONE*, 7, 1–13. <https://doi.org/10.1371/journal.pone.0048778>
- Song, N., Zhang, H., & Zhao, T. (2019). Insights into the phylogeny of Hemiptera from increased mitogenomic taxon sampling. *Molecular Phylogenetics and Evolution*, 137, 236–249. <https://doi.org/10.1016/j.ympev.2019.05.009>
- Terry, M. D., & Whiting, M. F. (2005). Mantophasmatodea and phylogeny of the lower neopterous insects. *Cladistics*, 21, 240–257. <https://doi.org/10.1111/j.1096-0031.2005.00062.x>
- Wipfler, B., Machida, R., Müller, B., & Beutel, R. G. (2011). On the head morphology of Grylloblattodea (Insecta) and the systematic position of the order, with a new nomenclature for the head muscles of Dicondylia. *Systematic Entomology*, 36, 241–266. <https://doi.org/10.1111/j.1365-3113.2010.00556.x>
- Zhang, H.-L., Huang, Y., Lin, L.-L., Wang, X.-Y., & Zheng, Z.-M. (2013). The phylogeny of the Orthoptera (Insecta) as deduced from mitogenomic gene sequences. *Zoological Studies*, 52, 1–13. <https://doi.org/10.1186/1810-522X-52-37>
