# Supplementary material for: Performance of tree-building methods using a morphological dataset and a well-supported Hexapoda phylogeny
Source: PeerJ journal article supplement (doi:10.7717/peerj.16706), 2024-01-08
Supplement: FileS3.pdf [file FileS3.pdf]

**Misof *et al.* (2014) reference tree**

((Diplura,(Archaeognatha,(Zygentoma,((Ephemeroptera,Odonata),(((Plecoptera,(Orthoptera,((Xenonomia,(Embioptera,Phasmatodea)),(Mantodea,(Blattodea,Isoptera)))))),(Dermaptera,Zoraptera)),(((Psocoptera,Phthiraptera),(Hymenoptera,(((Raphidioptera,(Megaloptera,Neuroptera)),(Coleoptera,Strepsiptera)),(Diptera,(Siphonaptera,Mecoptera)),(Trichoptera,Lepidoptera)))))),(Thysanoptera,Hemiptera))))), (Collembola,Protura));
