# Supplementary material for: Performance of tree-building methods using a morphological dataset and a well-supported Hexapoda phylogeny
Source: PeerJ journal article supplement (doi:10.7717/peerj.16706), 2024-01-08

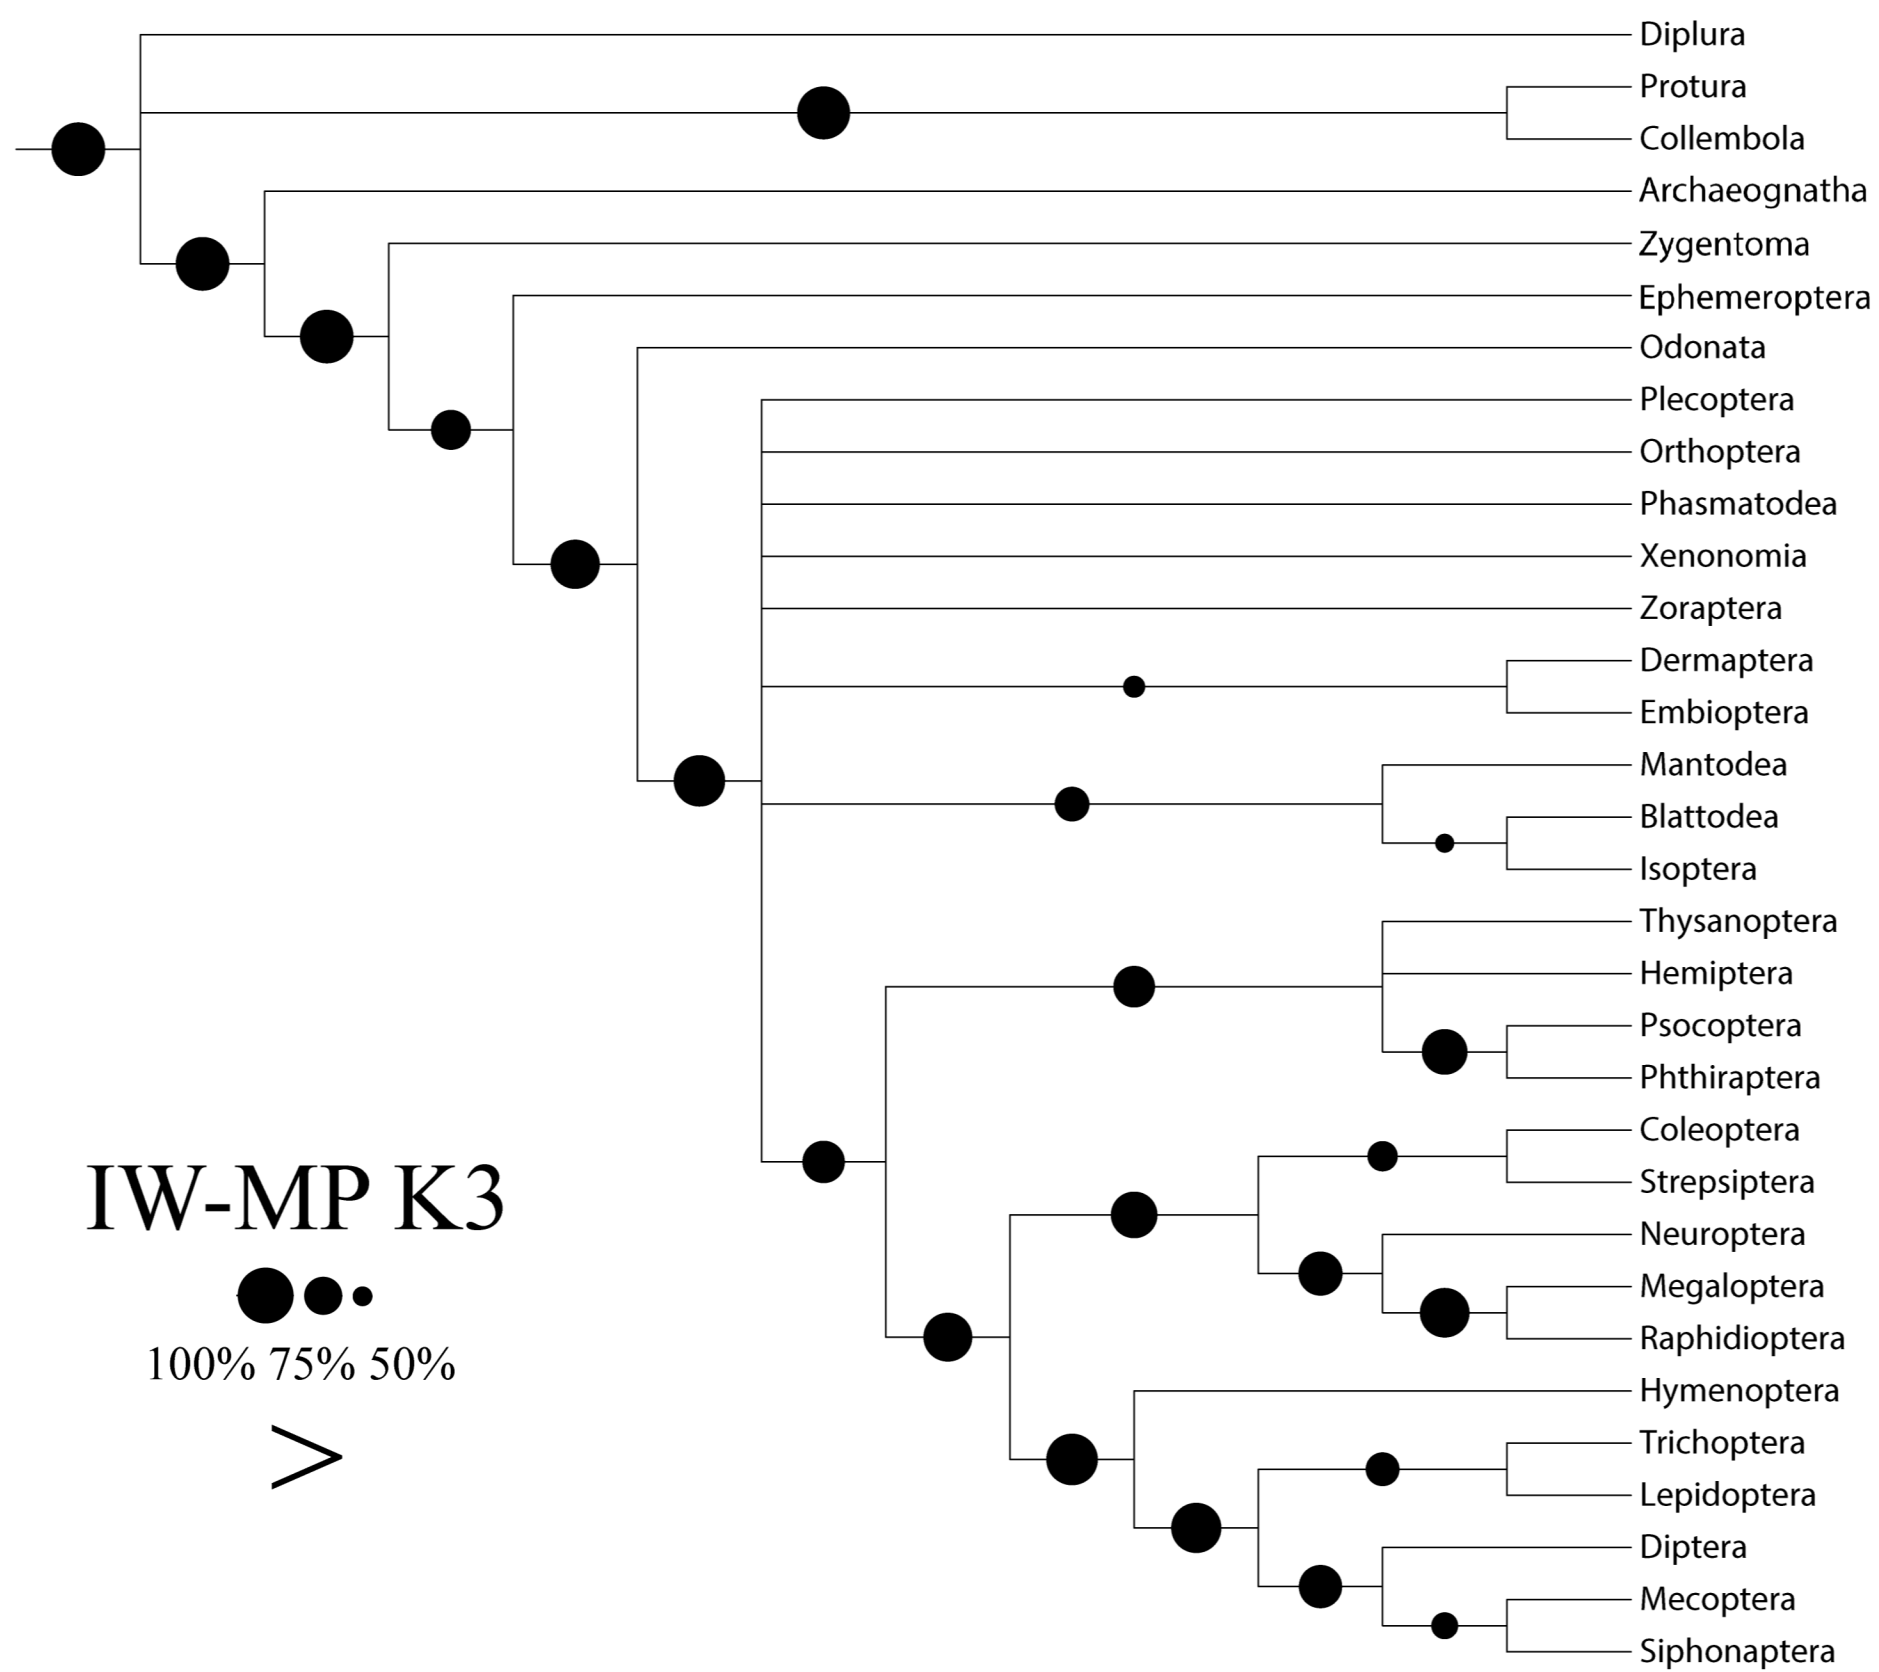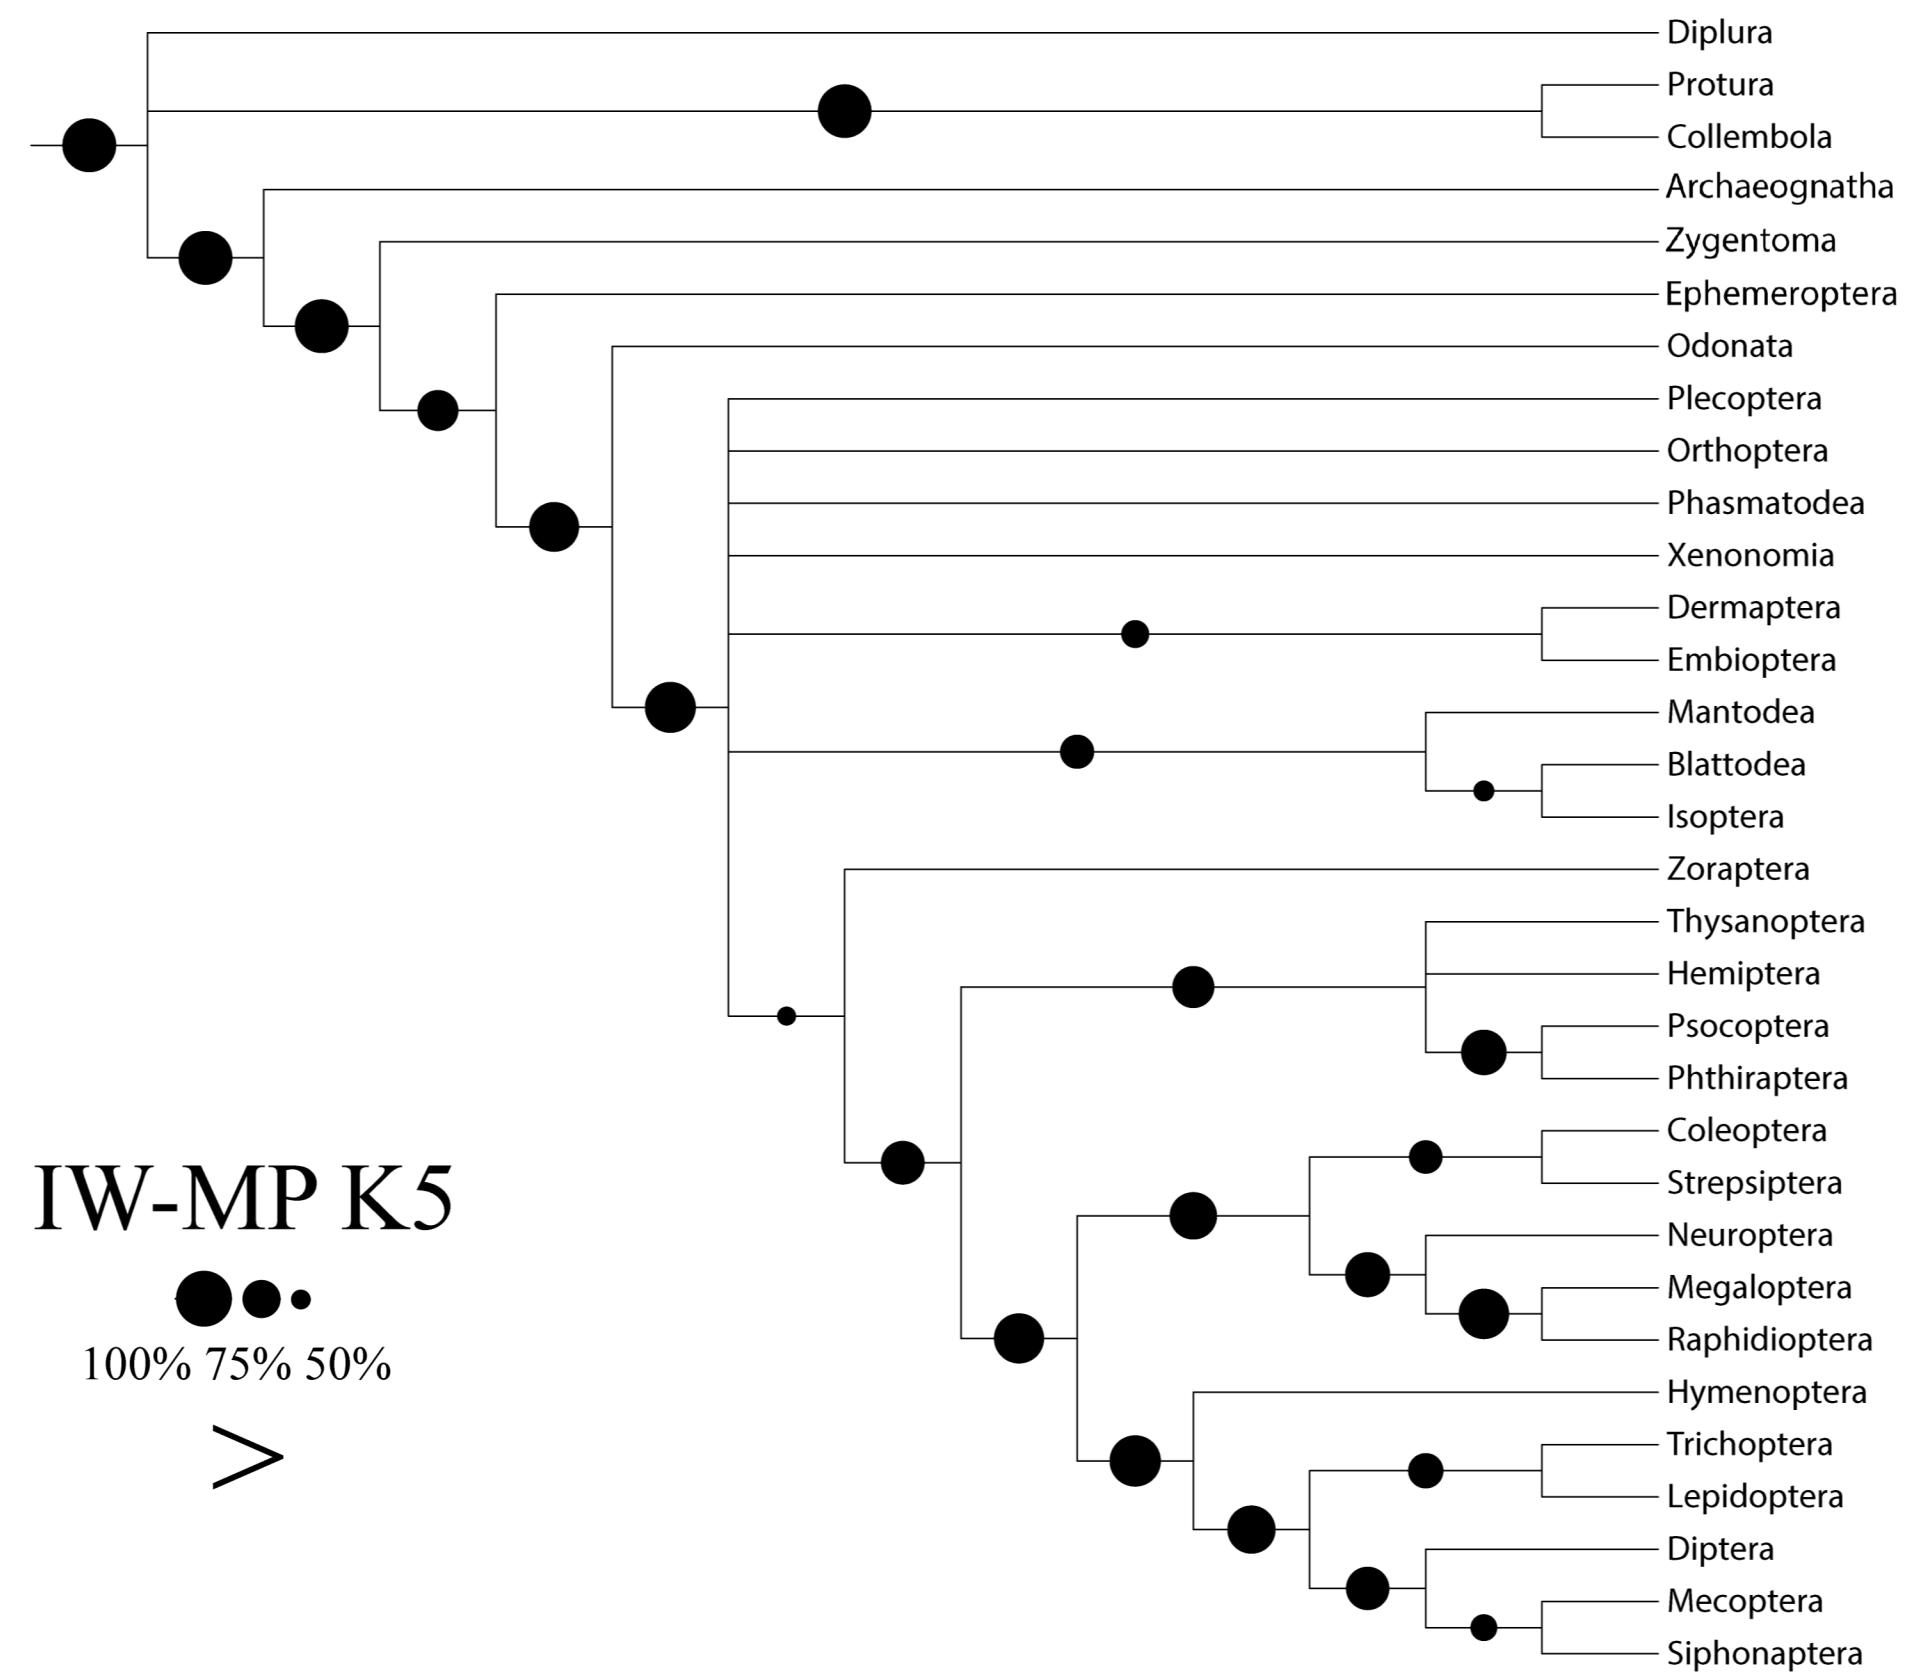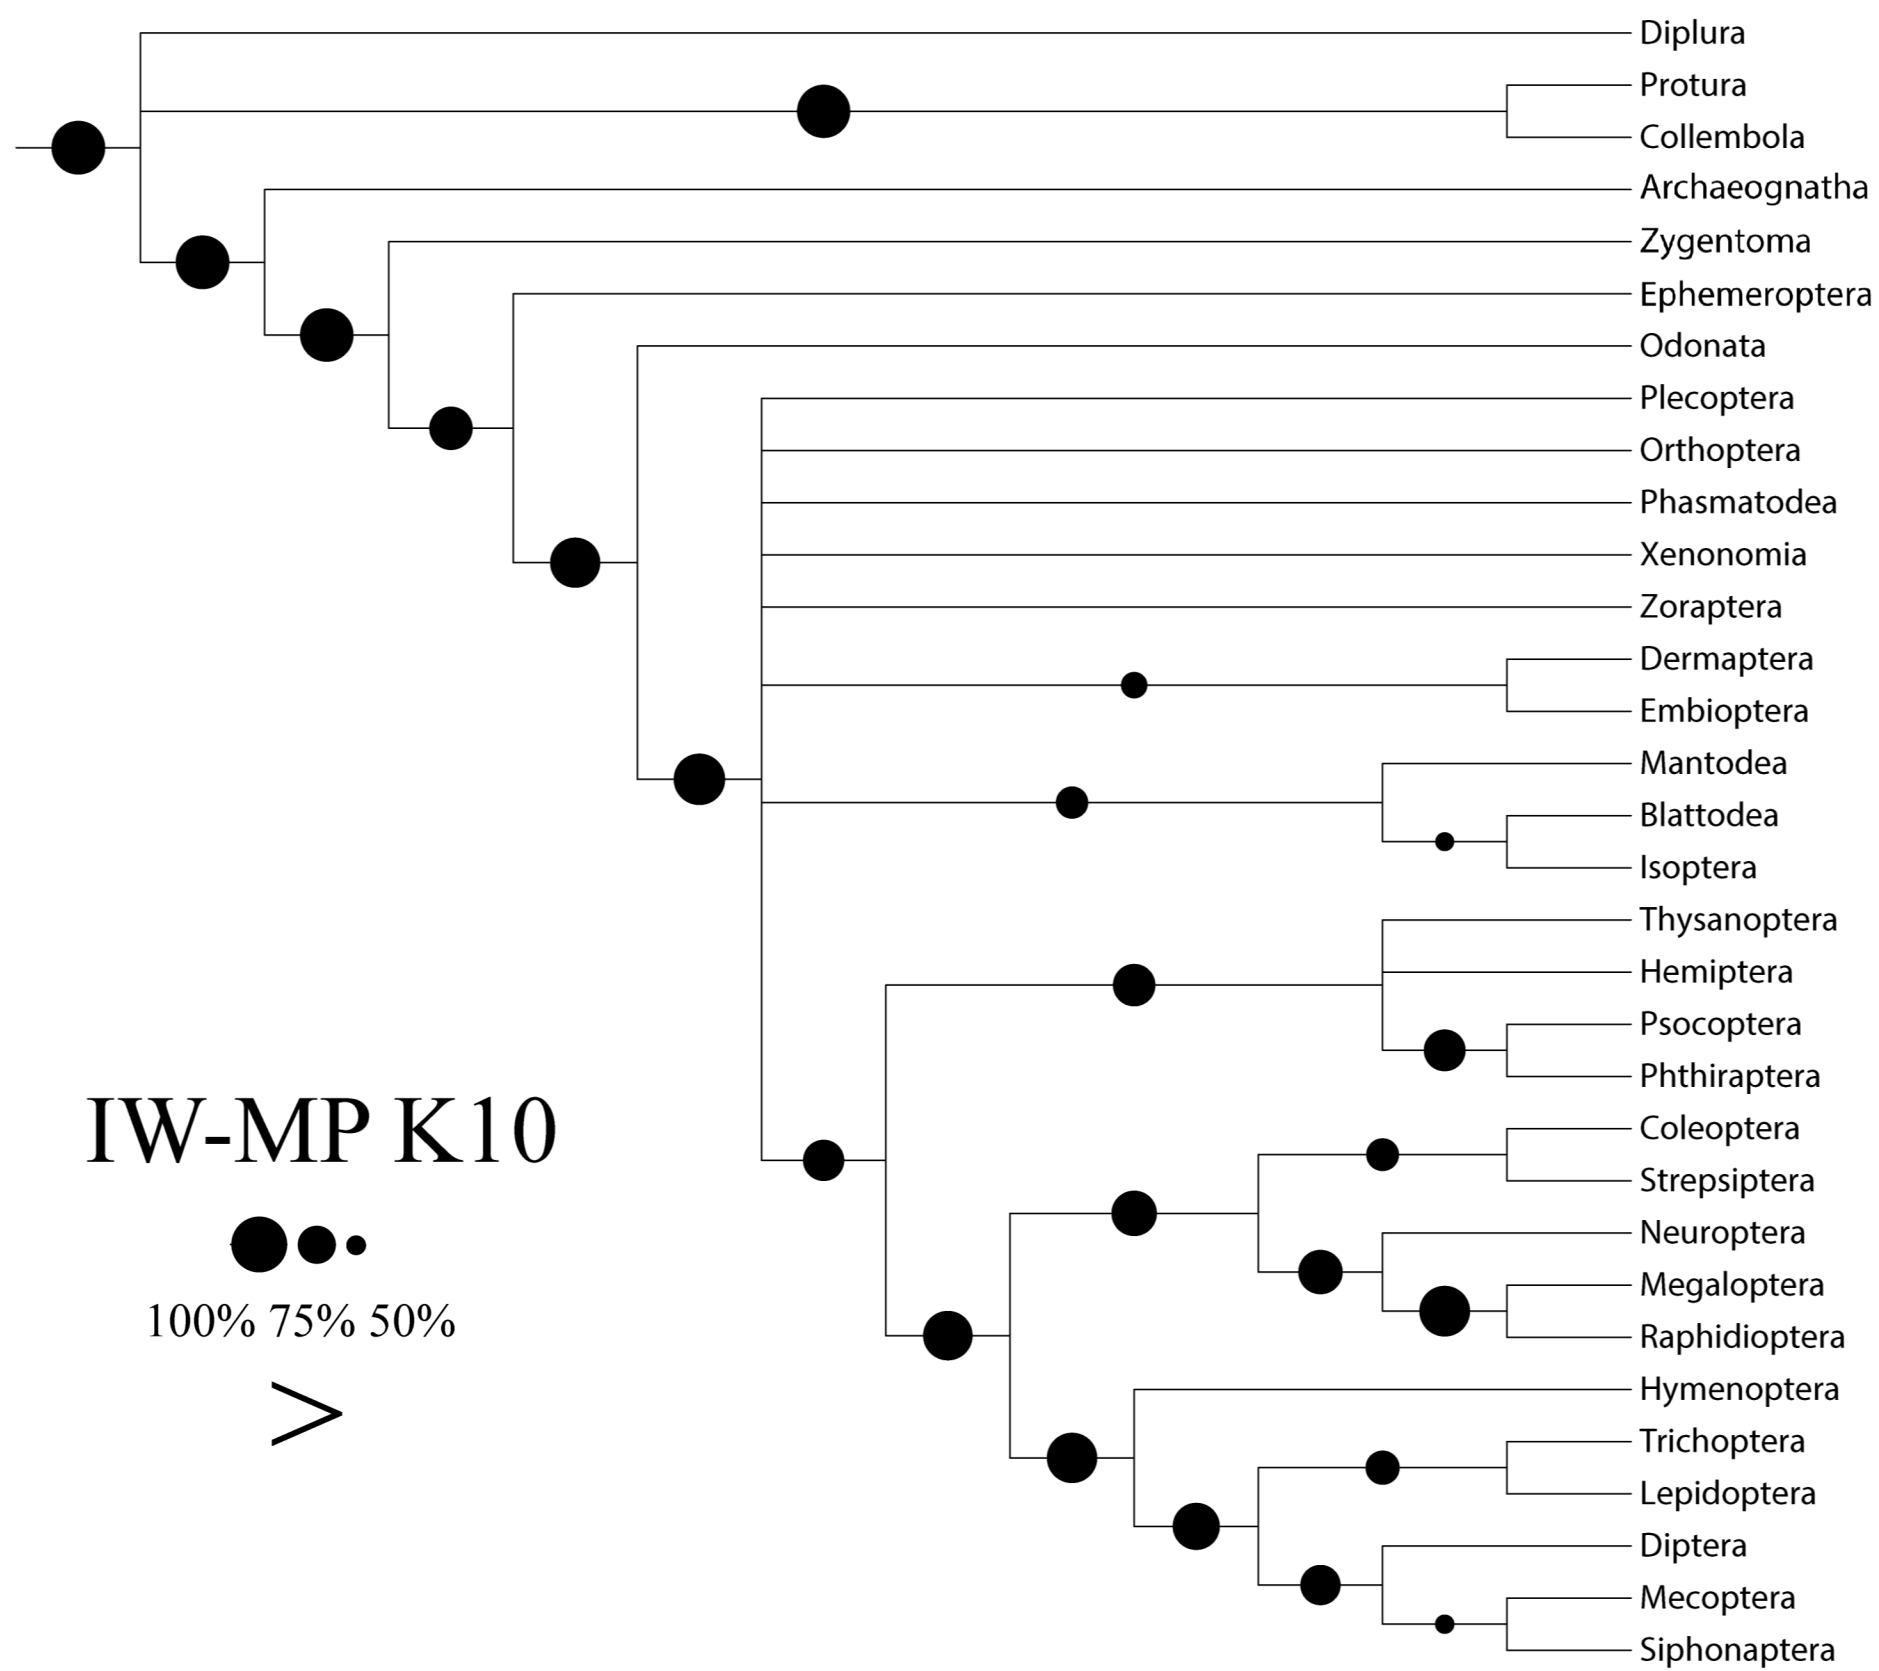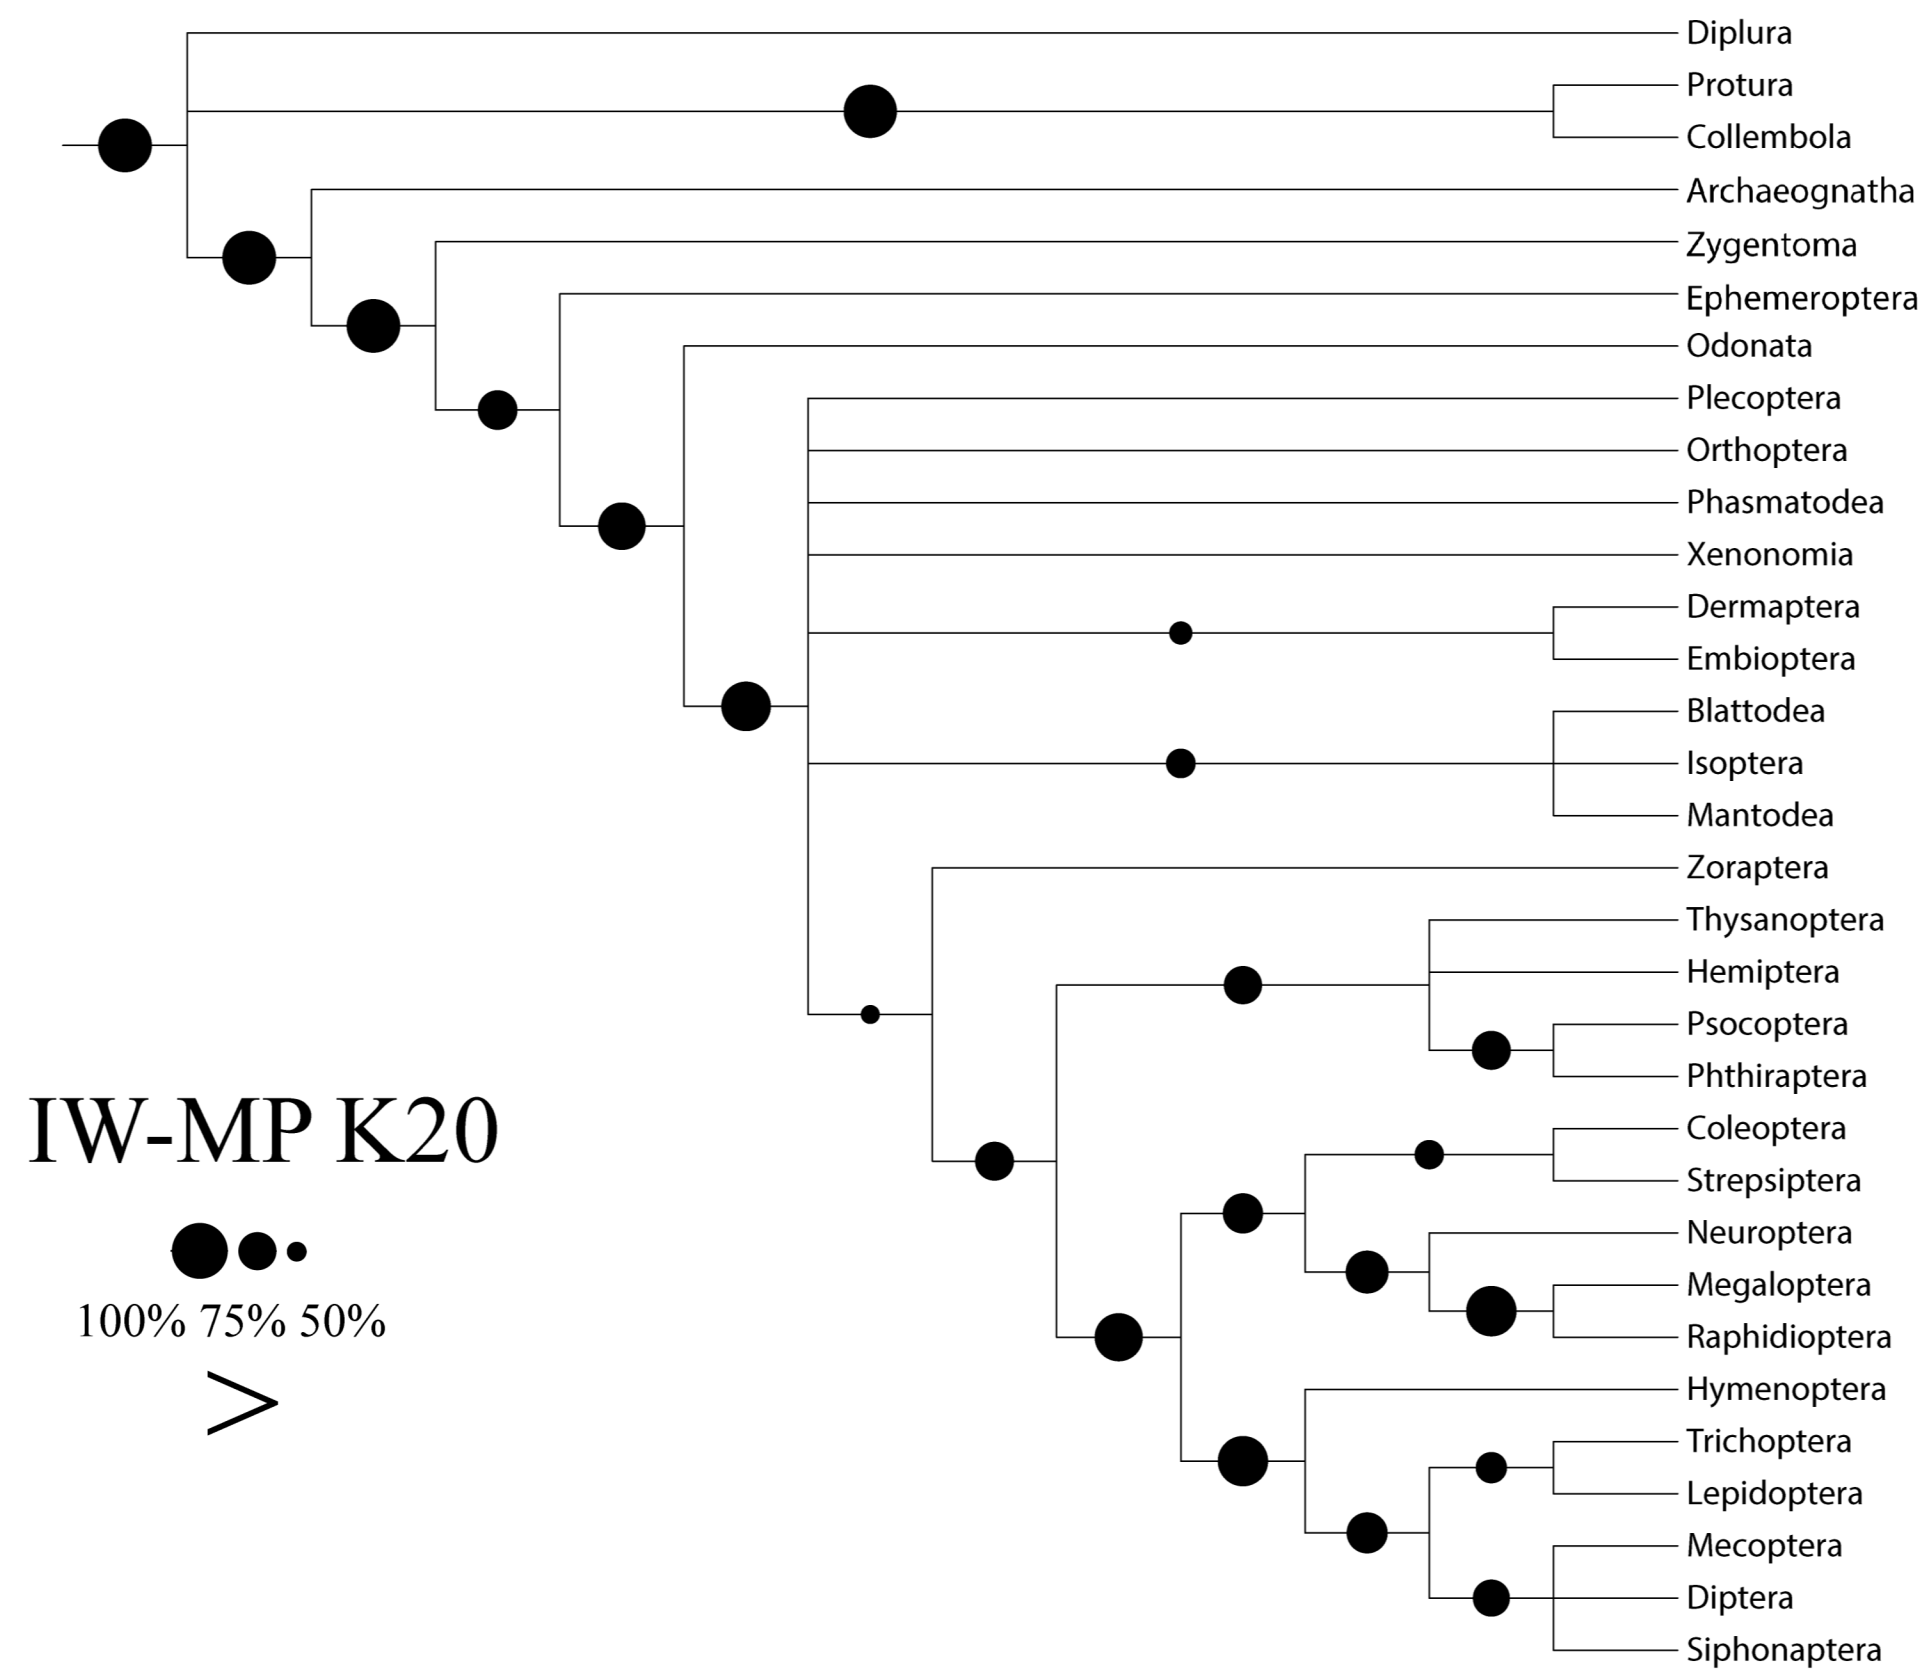

Supplement: FileS9.pdf [file FileS9.pdf]
